# Supplementary material for: Tectonic controls on the formation and evolution of internally drained systems in the western Betics fold-and-thrust belt (S Spain)
Source: Copernicus journal article supplement (doi:10.5194/egusphere-2025-538), 2025-02-25

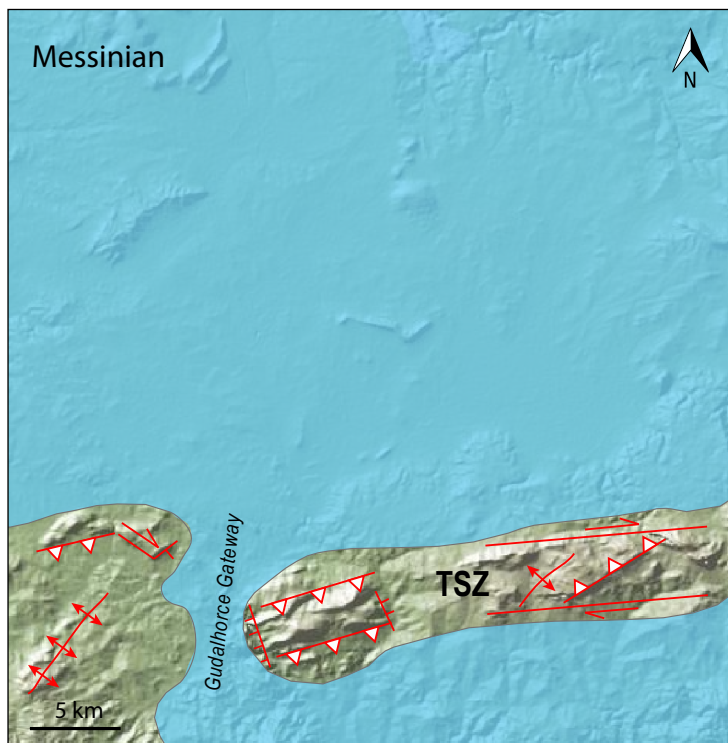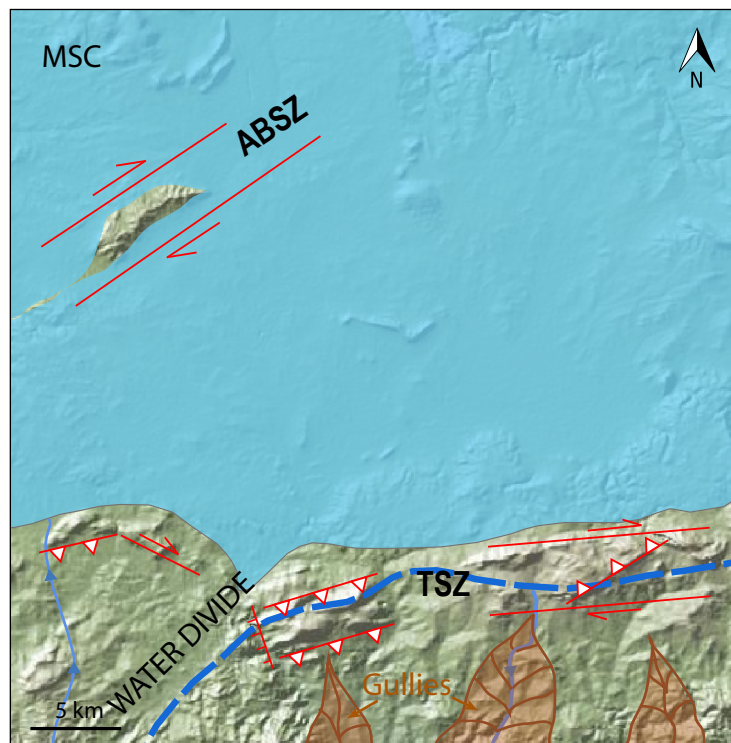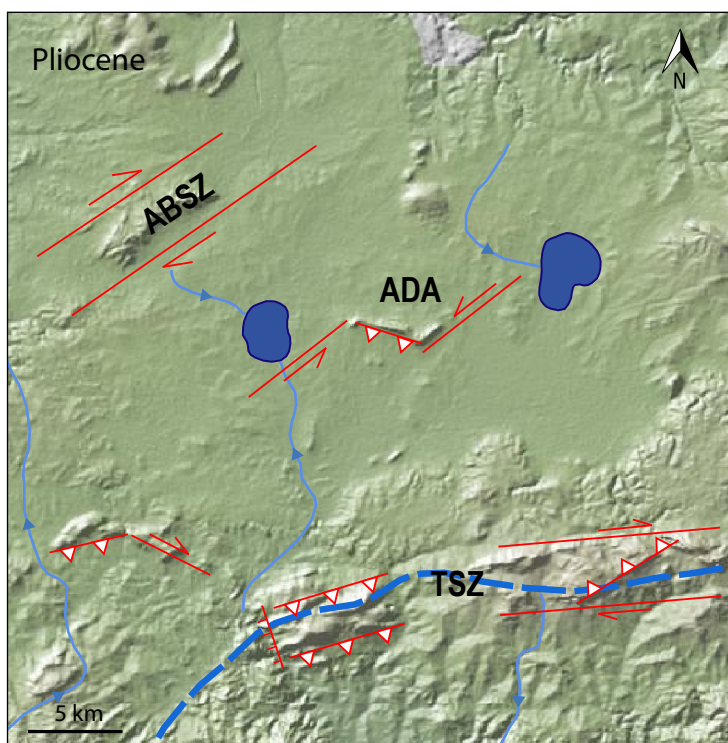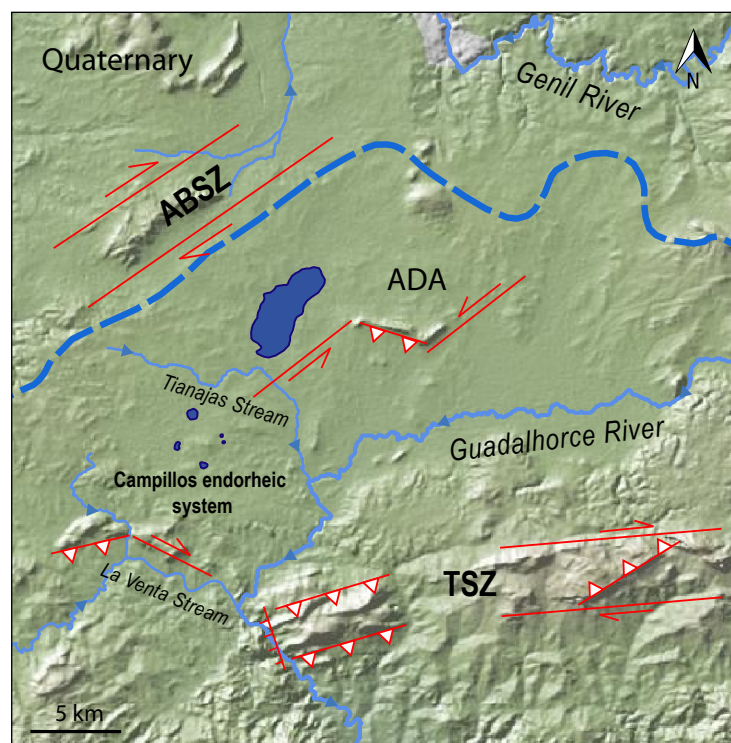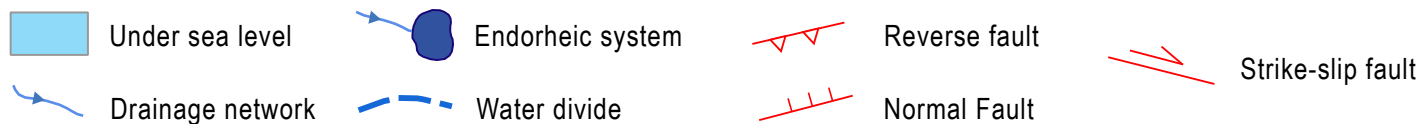

Supplement: Supplementary file [file egusphere-2025-538-AC1-supplement.pdf]
